# Supplementary material
Source: MDPI journal article supplement (https://www.mdpi.com/1424-2818/15/9/1004)
Supplement: s1 [file s1]

## **Supplementary Data**

### **Characterization of *Lacinutrix neustonica* sp. nov., Isolated from the Sea Surface Microlayer of Brackish Lake Shihwa, South Korea**

Jy Young Choi<sup>1</sup>, Soo Yoon Kim<sup>1</sup>, Yeon Woo Hong<sup>1</sup>, Bok Jin Kim<sup>1</sup>, Dong Young Shin<sup>1</sup>, Jin Kyeong Kang<sup>1</sup>, Byung Cheol Cho<sup>1,2</sup>, Chung Yeon Hwang<sup>1</sup>

<sup>1</sup>Microbial Oceanography Laboratory, School of Earth and Environmental Sciences and Research Institute of Oceanography, Seoul National University, Seoul 08826, Republic of Korea

<sup>2</sup>Saemangeum Environmental Research Center, Kunsan National University, Kunsan 54150, Republic of Korea

#### **\*Corresponding author:**

Prof. Chung Yeon Hwang

School of Earth and Environmental Sciences and Research Institute of Oceanography, Seoul National University, Seoul 08826, Republic of Korea

E-mail: chung.hwang@snu.ac.kr

**Table S1.** List of whole genome sequences of *Lacinutrix* spp. The genome sequence of *Lacinutrix neustonica* HL-RS19<sup>T</sup> was obtained in this study.

| No. | Organism Name                    | Strain                  | BioSample    | Assembly        | Level    | Size (Mb) | Coverage (x) | N50 (Mb) | GC%  | Scaffolds |
|-----|----------------------------------|-------------------------|--------------|-----------------|----------|-----------|--------------|----------|------|-----------|
| 1   | <i>Lacinutrix neustonica</i>     | HL-RS19 <sup>T</sup>    | SAMN30942755 | GCA_026625145.1 | Complete | 3.91      | 191          | 3.91     | 35.2 | 1         |
| 2   | <i>Lacinutrix algicola</i>       | AKS 293 <sup>T</sup>    | SAMN04002512 | GCA_001418085.1 | Contig   | 3.66      | 27           | 0.20     | 31.4 | 46        |
| 3   | <i>Lacinutrix himadriensis</i>   | E4-9a <sup>T</sup>      | SAMN04002506 | GCA_001418105.1 | Contig   | 4.17      | 177          | 0.35     | 32.6 | 32        |
| 4   | <i>Lacinutrix jangbagonensis</i> | PAMC 27137 <sup>T</sup> | SAMN02665270 | GCA_000797445.1 | Contig   | 4.02      | 35           | 0.18     | 32.2 | 46        |
| 5   | <i>Lacinutrix mariniflava</i>    | AKS 432 <sup>T</sup>    | SAMN04002510 | GCA_001418015.1 | Contig   | 3.97      | 40           | 0.37     | 31.8 | 32        |
| 6   | <i>Lacinutrix venerupis</i>      | DSM 28755 <sup>T</sup>  | SAMN07621379 | GCA_003663945.1 | Scaffold | 3.12      | 356          | 0.35     | 30.4 | 19        |

**Table S2.** Cellular fatty acid composition (%) of strain HL-RS19<sup>T</sup> and *L. mariniflava* KCCM 42306<sup>T</sup>.

Both strains were incubated at 20°C for 3 days on marine agar. Fatty acids higher than 5% of the total fatty acids are presented in bold. Fatty acids that represent <0.5 % in both strains have been omitted.

ND, not detected.

| <b>Fatty Acids</b>                                | <b>HL-RS19<sup>T</sup></b> | <b>KCCM 42306<sup>T</sup></b> |
|---------------------------------------------------|----------------------------|-------------------------------|
| <b>Saturated fatty acids</b>                      |                            |                               |
| C <sub>10:0</sub>                                 | 0.6                        | 1.1                           |
| C <sub>12:0</sub>                                 | 1.1                        | 1.8                           |
| C <sub>14:0</sub>                                 | 0.5                        | 0.7                           |
| C <sub>16:0</sub>                                 | 3.3                        | ND                            |
| <b>Unsaturated fatty acids</b>                    |                            |                               |
| C <sub>15:1</sub> ω5c                             | 1.4                        | 1.3                           |
| C <sub>15:1</sub> ω6c                             | ND                         | 2.7                           |
| C <sub>15:1</sub> ω8c                             | ND                         | 0.5                           |
| C <sub>16:1</sub> ω5c                             | ND                         | 1.0                           |
| C <sub>17:1</sub> ω6c                             | ND                         | 0.8                           |
| <b>Branched fatty acids</b>                       |                            |                               |
| iso-C <sub>12:0</sub>                             | 0.5                        | 0.6                           |
| iso-C <sub>13:0</sub>                             | 0.8                        | 0.5                           |
| iso-C <sub>14:0</sub>                             | 1.6                        | 1.4                           |
| iso-C <sub>15:0</sub>                             | <b>9.0</b>                 | <b>9.1</b>                    |
| iso-C <sub>15:1</sub> G                           | <b>16.5</b>                | <b>10.0</b>                   |
| iso-C <sub>16:0</sub>                             | 1.0                        | 1.7                           |
| iso-C <sub>16:1</sub> G                           | 0.6                        | ND                            |
| iso-C <sub>16:1</sub> H                           | ND                         | 2.5                           |
| anteiso-C <sub>13:0</sub>                         | 1.4                        | ND                            |
| anteiso-C <sub>15:0</sub>                         | <b>9.7</b>                 | <b>12.5</b>                   |
| anteiso-C <sub>15:1</sub> A                       | <b>9.9</b>                 | 6.5                           |
| anteiso-C <sub>17:1</sub> ω9c                     | 0.2                        | 2.5                           |
| <b>Hydroxy fatty acids</b>                        |                            |                               |
| C <sub>15:0</sub> 2-OH                            | 4.9                        | 5.2                           |
| C <sub>17:0</sub> 2-OH                            | 4.0                        | 3.2                           |
| C <sub>10:0</sub> 3-OH                            | 0.7                        | 1.4                           |
| C <sub>16:0</sub> 3-OH                            | ND                         | 0.7                           |
| iso-C <sub>15:0</sub> 3-OH                        | <b>8.3</b>                 | <b>10.8</b>                   |
| iso-C <sub>16:0</sub> 3-OH                        | <b>12.9</b>                | <b>7.7</b>                    |
| iso-C <sub>17:0</sub> 3-OH                        | 3.9                        | 3.5                           |
| <b>Cyclopropane fatty acids</b>                   |                            |                               |
| C <sub>17:0</sub> cyclo                           | ND                         | 0.7                           |
| <b>Summed Features</b>                            |                            |                               |
| 3 (C <sub>16:1</sub> ω7c / C <sub>16:1</sub> ω6c) | 4.7                        | <b>6.2</b>                    |
| 9 (iso-C <sub>17:1</sub> ω9c)                     | 0.2                        | 1.2                           |

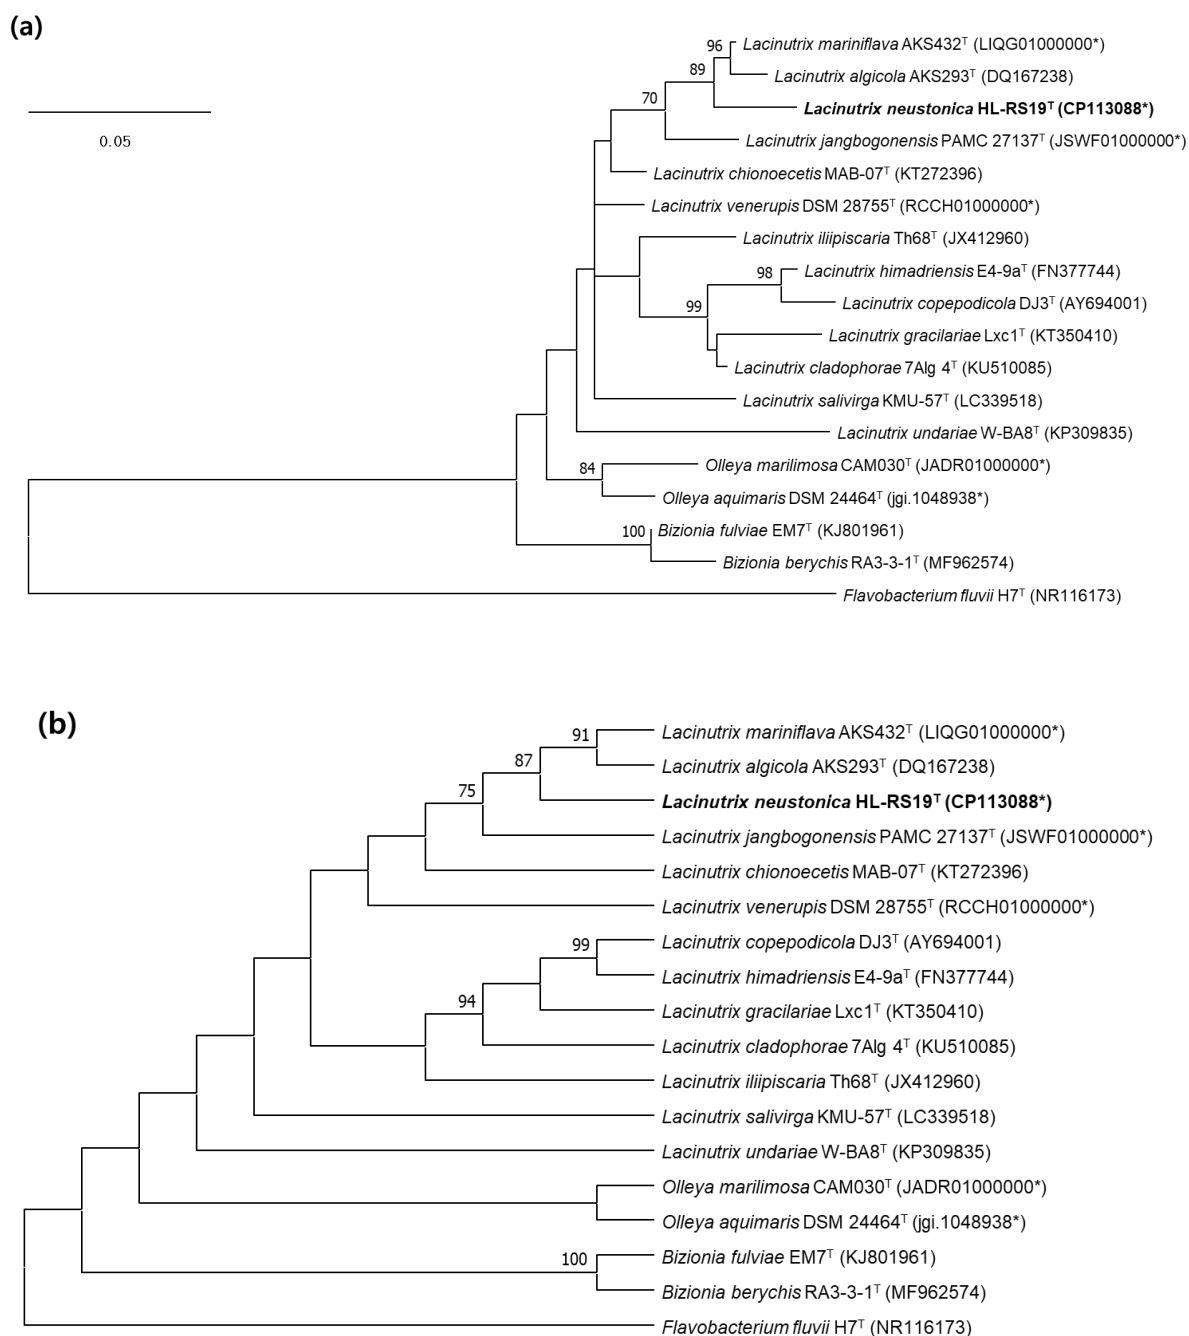

**Figure S1.** (a) Maximum likelihood (ML) and (b) maximum parsimony (MP) phylogenetic tree based on 16S rRNA gene sequences of strain HL-RS19<sup>T</sup> and related taxa in the family *Flavobacteriaceae*. *Flavobacterium fluvii* H7<sup>T</sup> was used as an outgroup. Bootstrap values at nodes indicate a percentage higher than 70% (based on 1000 replicates). The asterisk mark in the parentheses indicates 16S rRNA gene sequence retrieved from the genome sequence of the type strain.



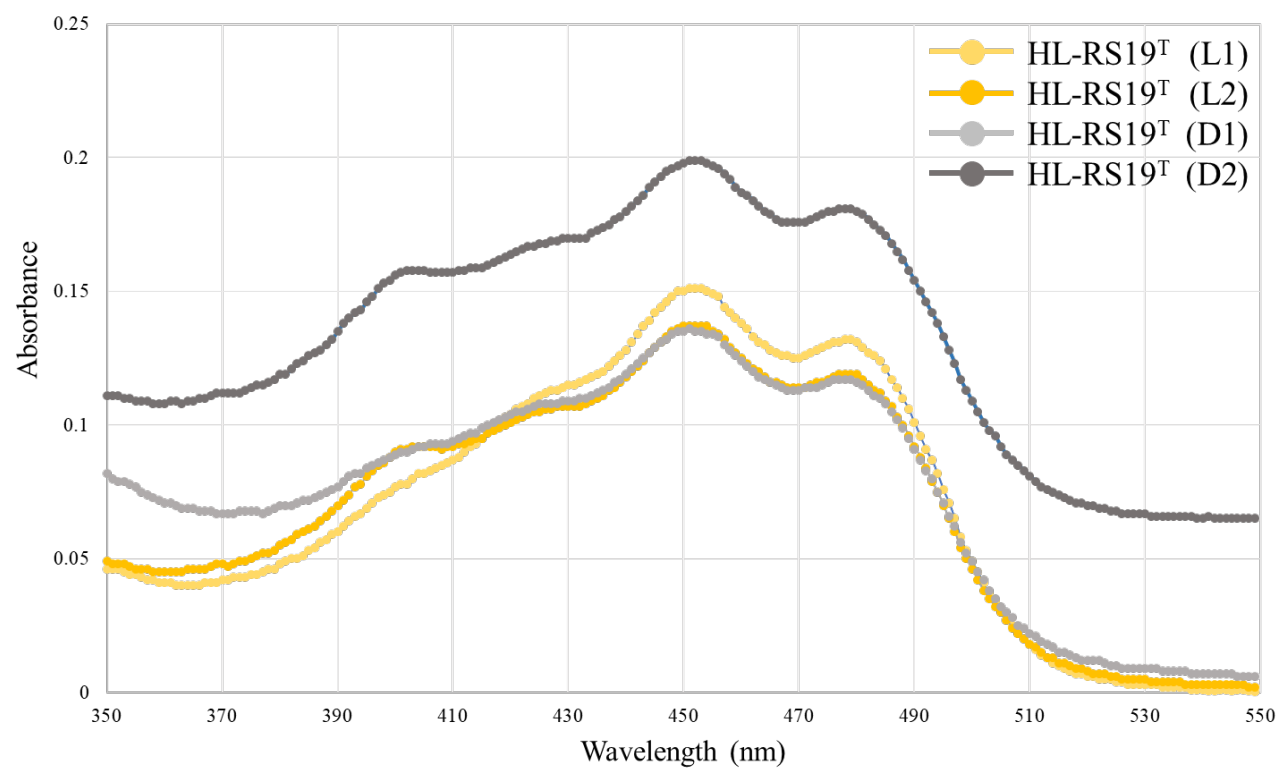

**Figure S3.** UV-VIS spectra of diverse carotenoids detected in strain HL-RS19<sup>T</sup> incubated under light and dark conditions.

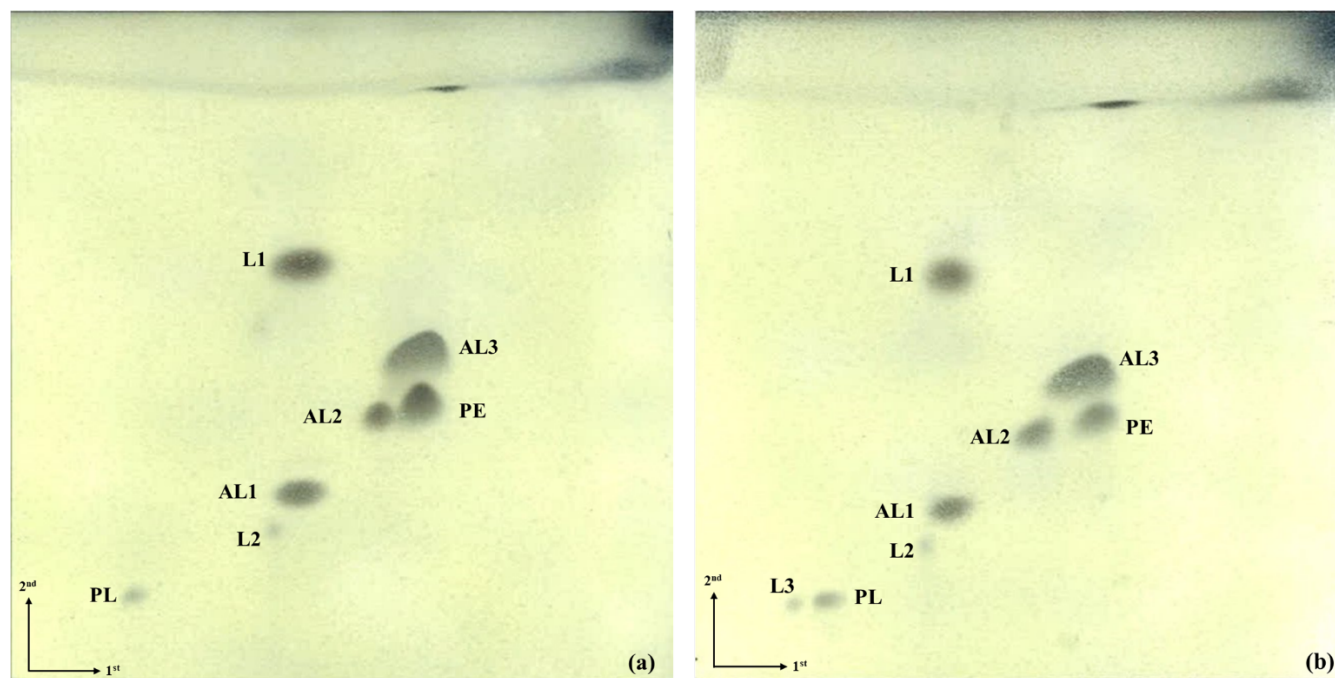

**Figure S4.** Two-dimensional thin-layer chromatography (TLC) of the polar lipids of (a) *Lacinutrix neustonica* HL-RS19<sup>T</sup> and (b) *Lacinutrix mariniflava* KCCM 42306<sup>T</sup>. PE, phosphatidylethanolamine; PL, an unidentified phospholipid; AL1–3, unidentified aminolipids; L1–3, unidentified lipids.
